# Supplementary figures and images for: Pattern of Prostate Cancer Recurrence Assessed by 68Ga-PSMA-11 PET/CT in Men Treated with Primary Local Therapy
Source: MDPI journal article supplement (doi:10.3390/jcm10173883), 2021-08-29

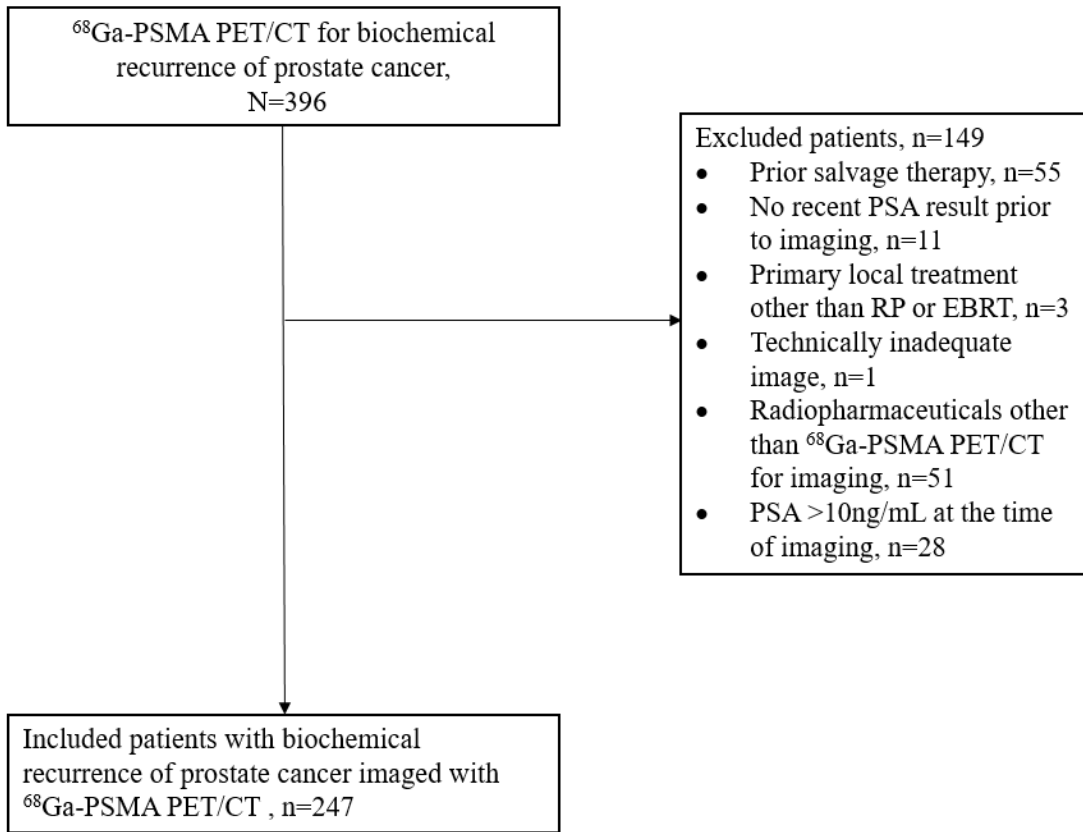

Figure S1: A flowchart showing the selection of patients for the study.

Supplement: s1 [file s1]
